# Supplementary material
Source: publisher figshare collection journal article supplement (https://karger.figshare.com/ndownloader/files/30610299)
Supplement: Supplementary file 1 [file 30610299]

**Supplementary Fig. 2**. Kaplan-Meier estimation curve of the HEA resolution, which factored in the result of OIT.

Those who achieved sustained unresponsiveness to HE through OIT were designated to have achieved tolerance. Those who continued OIT until they turned 12 years of age were designated to have continued elimination of HE. Those who were lost to follow up and those who discontinued OIT were designated to have dropped out. HEA, hen's egg allergy; OIT, oral immunotherapy.
